# Supplementary material for: Specific DNA methylation markers in the diagnosis and prognosis of esophageal cancer
Source: publisher site journal article supplement (doi:10.18632/aging.102569), 2019-12-13
Supplement: Supplementary file [file aging-v11i23-102569-supplementary-material-SD2.pdf]

## SUPPLEMENTARY TABLES

**Supplementary Table 1. Clinical characteristics of included samples (N = 1,744).**

| Characteristic        | Esophagus   |             |             |             | HNSC        |             | STAD        |              |
|-----------------------|-------------|-------------|-------------|-------------|-------------|-------------|-------------|--------------|
|                       | NSE         | BE          | EAC         | ESCC        | Normal      | Tumor       | Normal      | Tumor        |
| Total (n)             | 209         | 172         | 251         | 116         | 50          | 528         | 23          | 395          |
| Age (Mean ± SD)       | 63.0 ± 13.3 | 64.3 ± 12.8 | 65.0 ± 11.3 | 59.8 ± 10.5 | 62.6 ± 10.7 | 61.4 ± 11.9 | 64.3 ± 11.7 | 65.7 ± 10.7  |
| Gender -NO. (%)       |             |             |             |             |             |             |             |              |
| Female                | 39 (18.7%)  | 30 (17.4%)  | 24 (9.6%)   | 14 (12.1%)  | 12 (24.0%)  | 142 (26.9%) | 4 (17.4%)   | 136 (34.4%)  |
| Male                  | 163 (78.0%) | 138 (80.2%) | 222 (88.4%) | 90 (77.6%)  | 38 (76.0%)  | 386 (73.1%) | 19 (82.6%)  | 259 (65.6%)  |
| Missing data          | 7 (3.3%)    | 4 (2.3%)    | 5 (2.0%)    | 12 (10.3%)  | 0 (0.0%)    | 0 (0.0%)    | 0 (0.0%)    | 0 (0.0%)     |
| Smoking - NO. (%)     |             |             |             |             |             |             |             |              |
| No                    | 29 (13.9%)  | 4 (2.3%)    | 76 (30.3%)  | 39 (33.6%)  | 40 (80.0%)  | 230 (43.6%) | 8 (34.8%)   | 0 (0.0%)     |
| Yes                   | 55 (26.3%)  | 11 (6.4%)   | 118 (47.0%) | 51 (44.0%)  | 10 (20.0%)  | 298 (56.4%) | 13 (56.5%)  | 0 (0.0%)     |
| Missing data          | 125 (59.8%) | 157 (91.3%) | 57 (22.7%)  | 26 (22.4%)  | 0 (0.0%)    | 0 (0.0%)    | 2 (8.7%)    | 395 (100.0%) |
| Alcohol use - NO. (%) |             |             |             |             |             |             |             |              |
| No                    | 15 (7.2%)   | 1 (0.6%)    | 55 (21.9%)  | 24 (20.7%)  | 13 (26.0%)  | 165 (31.2%) | 9 (39.1%)   | 0 (0.0%)     |
| Yes                   | 51 (24.4%)  | 14 (8.1%)   | 111 (44.2%) | 64 (55.2%)  | 36 (72.0%)  | 352 (66.7%) | 12 (52.2%)  | 0 (0.0%)     |
| Missing data          | 143 (68.4%) | 157 (91.3%) | 85 (33.9%)  | 28 (24.1%)  | 1 (2.0%)    | 11 (2.1%)   | 2 (8.7%)    | 395 (100.0%) |
| AJCC stage -NO. (%)   |             |             |             |             |             |             |             |              |
| I                     | -           | -           | 8 (3.2%)    | 6 (5.2%)    | -           | 27 (5.1%)   | -           | 52 (13.2%)   |
| II                    | -           | -           | 21 (8.4%)   | 56 (48.3%)  | -           | 74 (14.0%)  | -           | 125 (31.6%)  |
| III                   | -           | -           | 26 (10.4%)  | 29 (25.0%)  | -           | 82 (15.5%)  | -           | 174 (44.1%)  |
| IV                    | -           | -           | 5 (2.0%)    | 7 (6.0%)    | -           | 270 (51.1%) | -           | 33 (8.4%)    |
| Missing data          | -           | -           | 191 (76.1%) | 18 (15.5%)  | -           | 75 (14.2%)  | -           | 11 (2.8%)    |

**Supplementary Table 2. R packages used in various analyses.**

| <b>R packages</b>                            | <b>Function in analyses</b>                   |
|----------------------------------------------|-----------------------------------------------|
| minfi                                        | Data pre-processing                           |
| limma                                        | Moderated t-statistics                        |
| IlluminaHumanMethylation450kanno.ilmn12.hg19 | Annotation of CpG sites                       |
| pheatmap                                     | Hierarchical clustering and heatmap           |
| glmnet                                       | LASSO                                         |
| nnet                                         | Multinomial logistic model                    |
| multiROC                                     | ROC curves across multi-class classifications |
| survival                                     | Cox model                                     |
| timeROC                                      | Time-dependent ROC analysis                   |

**Supplementary Table 3. Coefficients of multinomial logistic model derived from training set.**

|             | <b>BE</b> | <b>EAC</b> | <b>ESCC</b> |
|-------------|-----------|------------|-------------|
| (Intercept) | -17.53    | -20.18     | -33.93      |
| cg06966660  | 2.99      | 0.41       | 6.80        |
| cg08436756  | -1.40     | -5.09      | -13.01      |
| cg08858649  | 5.02      | 13.08      | 6.05        |
| cg10078335  | -4.93     | 6.01       | 7.78        |
| cg13257812  | 35.65     | -25.59     | -0.86       |
| cg01025720  | 0.32      | -3.91      | 0.21        |
| cg03474687  | 17.26     | 17.39      | 10.93       |
| cg04607372  | 3.64      | -2.61      | -3.08       |
| cg13441766  | 11.80     | 8.66       | 6.92        |
| cg13927501  | 4.39      | 20.38      | 42.16       |
| cg14534279  | 3.32      | -0.74      | 0.63        |
| cg18080046  | -4.07     | -13.41     | -2.01       |

**Supplementary Table 4. Estimation of time-dependent AUC of clinical factors and prognostic methylation classifier for EAC and ESCC.**

| <b>Risk factor</b>     | <b>EAC</b>            |           | <b>ESCC</b>           |           |
|------------------------|-----------------------|-----------|-----------------------|-----------|
|                        | <b>3 year-AUC (%)</b> | <b>SE</b> | <b>3 year-AUC (%)</b> | <b>SE</b> |
| Age                    | 43.73                 | 11.52     | 74.80                 | 9.62      |
| Gender                 | 50.52                 | 5.24      | 82.34                 | 13.72     |
| BMI                    | 54.26                 | 9.51      | 1.04                  | 1.16      |
| Smoking                | 54.41                 | 8.31      | 53.09                 | 14.55     |
| Alcohol use            | 42.04                 | 8.40      | 39.80                 | 5.27      |
| Tumor stage            | 75.14                 | 8.32      | 69.55                 | 16.08     |
| Methylation classifier | 93.82                 | 3.24      | 97.47                 | 3.18      |
